## 1 **Genomic Epidemiology of SARS-CoV-2 in Seychelles, 2020-2021**

2

3 **Authors :** John Mwita Morobe<sup>1</sup>, Brigitte Pool<sup>2</sup>, Lina Marie<sup>2</sup>, Dwayne Didon<sup>2</sup>, Arnold  
4 W. Lambisia<sup>1</sup>, Timothy Makori<sup>1</sup>, Khadija Said Mohammed<sup>1</sup>, Zaydah R. de Laurent<sup>1</sup>,  
5 Leonard Ndwiga<sup>1</sup>, Maureen W. Mburu<sup>1</sup>, Edidah Moraa<sup>1</sup>, Nickson Murunga<sup>1</sup>, Jennifer  
6 Musyoki<sup>1</sup>, Jedida Mwacharo<sup>1</sup>, Lydia Nyamako<sup>1</sup>, Debra Riako<sup>1</sup>, Pariken Ephnatus<sup>1</sup>,  
7 Faith Gambo<sup>1</sup>, Josephine Naimani<sup>1</sup>, Joyce Namulondo<sup>3,4</sup>, Susan Zimba Tembo<sup>3</sup>,  
8 Edwin Ogendi<sup>3</sup>, Thierno, Balde<sup>5</sup>, Fred Athanasius Dratibi<sup>5</sup>, Yahaya Ali Ahmed<sup>5</sup>,  
9 Nicksy Gumede<sup>5</sup>, Rachel A. Achilla<sup>5</sup>, Peter K. Borus<sup>6</sup>, Dorcas Wanjohi<sup>7</sup>, Sofonias K.  
10 Tessema<sup>7</sup>, Joseph Mwangangi<sup>1</sup>, Philip Bejon<sup>1</sup>, D. James Nokes<sup>1,8</sup>, Lynette Isabella  
11 Ochola-Oyier<sup>1</sup>, George Githinji<sup>1,9</sup>, Leon Biscornet<sup>2</sup>, Charles N. Agoti<sup>1,10</sup>

12

### 13 **Author Affiliations**

14 <sup>1</sup>Kenya Medical Research Institute - Wellcome Trust Research Programme  
15 (KWTRP), Kilifi, Kenya.

16 <sup>2</sup>Seychelles Public Health Laboratory, Public Health Authority, Ministry of Health,  
17 Seychelles.

18 <sup>3</sup> World Health Organization-Seychelles Country Office

19 <sup>4</sup>Department of Arbovirology, Emerging and Re-emerging Infectious Diseases -  
20 Uganda Virus Research Institution (UVRI), Entebbe, Uganda

21 <sup>5</sup> World Health Organization Regional Center for Africa

22 <sup>6</sup> World Health Organization-Kenya Country Office

23 <sup>7</sup>Africa Centres for Disease Control and Prevention (Africa CDC), Addis Ababa,  
24 Ethiopia.

25 <sup>8</sup>University of Warwick, Coventry, United Kingdom.

26 <sup>9</sup>Department of Biochemistry and Biotechnology, Pwani University, Kilifi, Kenya

27 <sup>10</sup>Department of Public Health, Pwani University, Kilifi, Kenya.

28

29 **Corresponding author :** [jmwita@kemri-wellcome.org](mailto:jmwita@kemri-wellcome.org)

30

31 **Key words:** Seychelles, SARS-CoV-2, Variants of concern

32 **ABSTRACT**

33 Seychelles, an archipelago of 155 islands in the Indian Ocean, had confirmed  
34 24,788 cases of severe acute respiratory syndrome coronavirus 2 (SARS-CoV-2) by  
35 the 31<sup>st</sup> December 2021. The first SARS-CoV-2 cases in Seychelles were reported  
36 on the 14<sup>th</sup> of March 2020, but cases remained low until January 2021, when a surge  
37 of SARS-CoV-2 cases was observed on the islands. Here, we investigated the  
38 potential drivers of the surge by genomic analysis 1,056 SARS-CoV-2 positive  
39 samples collected in Seychelles between 14<sup>th</sup> March 2020 and 31<sup>st</sup> December 2021.  
40 The Seychelles genomes were classified into 32 Pango lineages, 1,042 of which fell  
41 within four variants of concern i.e., Alpha, Beta, Delta and Omicron. Sporadic cases  
42 of SARS-CoV-2 detected in Seychelles in 2020 were mainly of lineage B.1  
43 (European origin) but this lineage was rapidly replaced by Beta variant starting  
44 January 2021, and which was also subsequently replaced by the Delta variant in  
45 May 2021 that dominated till November 2021 when Omicron cases were identified.  
46 Using ancestral state reconstruction approach, we estimated at least 78 independent  
47 SARS-CoV-2 introduction events into Seychelles during the study period. Majority of  
48 viral introductions into Seychelles occurred in 2021, despite substantial COVID-19  
49 restrictions in place during this period. We conclude that the surge of SARS-CoV-2  
50 cases in Seychelles in January 2021 was primarily due to the introduction of more  
51 transmissible SARS-CoV-2 variants into the islands.

## 52 **BACKGROUND**

53           Seychelles, an archipelago of 155 islands in the Indian Ocean with a  
54 population size of approximately 99,202<sup>1</sup>, confirmed its first cases of severe acute  
55 respiratory syndrome coronavirus 2 (SARS-CoV-2), the aetiological agent of  
56 coronavirus disease 2019 (COVID-19), on the 14<sup>th</sup> March 2020. This was shortly  
57 after the World Health Organisation (WHO) declared COVID-19 a global pandemic  
58 on the 11<sup>th</sup> March 2020. However, the number of COVID-19 cases in Seychelles  
59 remained low (average of 1 case/day) until January 2021 when a surge was  
60 observed in the country (average of 72 cases/day). As of 31<sup>st</sup> December 2021,  
61 Seychelles had reported 24,788 laboratory-confirmed COVID-19 cases, >98% of  
62 which were recorded in 2021<sup>2</sup>. The surge of the number of COVID-19 cases in  
63 Seychelles in 2021 could be due to 2 major factors: (a) the relaxation of government  
64 COVID-19 stringency measures and (b) the arrival of more transmissible SARS-  
65 CoV-2 variants on the islands. Our analysis looked at these factors in an attempt to  
66 improve understanding of the COVID-19 transmission dynamics in Seychelles.

67           The first round of COVID-19 countermeasures by the Seychelles government  
68 to curb introductions and spread of the virus were announced in March 2020. These  
69 measures included: a 14-day quarantine for people returning from countries with  
70 significant COVID-19 community transmission on the 16<sup>th</sup> March 2020, closure of  
71 day care centres and learning institutions, and ban on international arrivals and  
72 foreign travel by Seychellois citizens, except for medical emergencies beginning 23<sup>rd</sup>  
73 March 2020, a 21-day nationwide lockdown, tracing, isolation and monitoring of all  
74 persons who had close contact with COVID-19 patients for 14 days beginning 6<sup>th</sup>  
75 April 2020, closure of all shops except those that sell food items, groceries,  
76 pharmaceutical products beginning 6<sup>th</sup> April 2020, workplace closures and restriction  
77 of outdoor movement except for essential services on 9<sup>th</sup> April. On the 4<sup>th</sup> of May  
78 2020, the Seychelles government eased some of the COVID-19 restrictions,  
79 including opening of all day care and learning institutions, opening of all shops, and  
80 lifting of the ban on restrictions of movement of people. In June 2020, the Seychelles  
81 government lifted the ban on international travel and allowed visitors (international  
82 tourists) from countries categorised as low-risk countries, however with a  
83 requirement to show a COVID-19 negative certificate (RT-PCR test). Despite this  
84 removal of many of the Government restrictions, the number of SARS-CoV-2 cases  
85 in Seychelles throughout 2020 remained low.

86 Towards the end of 2020 and in 2021, in widely different geographical  
87 locations, five SARS-CoV-2 variants of concern (VOC) - Alpha, Beta, Gamma, Delta  
88 and Omicron, five variants of variants of interest (VOI) – Eta, Kappa, Iota, Epsilon  
89 and Theta and over 10 variants under monitoring (VUM) - emerged that appeared to  
90 be considerably more transmissible and with potential to escape pre-existing  
91 immunity<sup>3,4</sup>. Notably, the surge of COVID-19 cases in Seychelles in early 2021  
92 coincided with their emergence. Further, in the last quarter of 2021, the Omicron  
93 SARS-CoV-2 variants of concern (VOCs) was detected globally<sup>4</sup>. The emergence  
94 and spread of these variants of concern globally, has exacerbated the effect of the  
95 COVID-19 pandemic<sup>5</sup>. The objective of this study was to describe the genomic  
96 epidemiology of SARS-CoV-2 in Seychelles and in particular lineages coinciding with  
97 the surge of cases that began in January 2021, with the aim of improving the  
98 understanding on the introduction and transmission of SARS-CoV-2 in Seychelles.

99

## 100 **MATERIALS AND METHODS**

101

### 102 **Ethical statement**

103 The SARS-CoV-2 positive samples were sequenced at the Kenya Medical  
104 Research Institute (KEMRI) - Wellcome Trust Research Programme (KWTRP) as  
105 part of a regional collaborative COVID-19 public health rapid response initiative  
106 overseen by WHO-AFRO and Africa-CDC. KWTRP Kilifi is one of the 12 designated  
107 WHO-AFRO/Africa-CDC regional reference laboratories for SARS-CoV-2 genomic  
108 surveillance in Africa. The whole genome sequencing study protocol was reviewed  
109 and approved by the Scientific and Ethics Review Committee (SERU) at KEMRI,  
110 (SERU #4035). Individual patient consent requirement was waived by the  
111 committee as the sequenced samples were part of the public health emergency  
112 response.

113

### 114 **Study site and samples**

115 A total of 1,298 SARS-CoV-2 real-time polymerase chain reaction (qRT-  
116 PCR)-confirmed nasopharyngeal and oropharyngeal (NP/OP) positive swab samples  
117 collected between 14<sup>th</sup> March 2020 and 31<sup>st</sup> December 2021 were targeted for whole  
118 genome sequencing. The samples received for sequencing at KWTRP for whole  
119 genome sequencing were selected considering cycle threshold (Ct) value cut off

120 <30. The monthly temporal distribution of samples selected for whole genome  
121 sequencing is shown in **Supplementary Figure 1**.

122

## 123 **Laboratory procedures**

### 124 **RNA extraction, cDNA synthesis and amplification**

125 The NP/OP swab samples on arrival at KWTRP laboratories were re-  
126 extracted using the QIAamp Viral RNA Mini Kit (Qiagen, Manchester, UK) following  
127 the manufacturer's instructions, starting volume 140 µl, and elution volume of 60 µl.  
128 The RNA was then re-assayed to confirm SARS-CoV-2 genetic material using one of  
129 three commercial kits namely, Da An Gene Co. Ltd.'s Detection Kit (targeting N gene  
130 or ORF1ab), SD Biosensor's Standard M Real Time Detection Kit (targeting E gene  
131 and ORF1ab) or KH Medical's RAD1 COVID-19 Detection Kit (targeting RdRp and S  
132 genes) while following manufacturer's instructions. Samples with Ct values <33 were  
133 selected for cDNA synthesis.

134 Extracted RNA was reverse transcribed using the LunaScript® RT SuperMix  
135 Kit (New England Biolabs, US). For each of the selected sample, 2 µl of the  
136 LunaScript® RT SuperMix was added to 8 µl of RNA template, incubated at 25°C for  
137 2 minutes, 55°C for 10 minutes, held at 95°C for 1 minute and placed on ice for 1  
138 minute. The generated viral cDNA was amplified using the Q5® Hot Start High-  
139 Fidelity 2X Master Mix (NEB, US) along with ARTIC nCoV-2019 version 3 primers  
140 (primer pools A and B), as documented previously<sup>6</sup>. The thermocycling conditions  
141 involved a touchdown PCR with the following conditions: heat activation at 98°C for  
142 30 seconds, followed by 40 amplification cycles (i.e., 25 cycles of 98°C for 15  
143 seconds and 65°C for 5 minutes, and 15 cycles of 62.5°C for 5 minutes and 98°C for  
144 15 seconds and one cycle at 62.5°C for 5 minutes), final extension at 62.5°C for 5  
145 minutes, followed by a final hold at 4°C. To overcome amplicon dropouts in regions  
146 3, 9, 17, 26, 64, 66, 67, 68, 74, 88, 91 and 92 of the genomes<sup>6</sup>, primer pairs for the  
147 aforementioned regions were constituted in an additional pool, named herein pool C.  
148 After the multiplex PCR, an agarose gel electrophoresis step was included to  
149 exclude samples with no visible bands from further processing.

### 150 **Oxford Nanopore library preparation and sequencing**

151 For each sample, the PCR products of primer pools A, B and C were  
152 combined to make a total of 23µl (all of pool A (10µl), pool B (10µl) and pool C(3µl))

153 and cleaned using 1x AMPure XP beads (Beckman Coulter, US), followed by two  
154 ethanol (80%) washes. The pellet was resuspended in 20 µl nuclease-free water and  
155 1 µl of the eluted sample was quantified using the Qubit dsDNA HS Assay Kit  
156 (ThermoFisher Scientific, US). End-prep reaction was performed according to the  
157 ARTIC nCoV-2019 sequencing protocol v3 (LoCost) with 200 fmol (50ng) of  
158 amplicons and the NEBNext Ultra II End repair/dA-tailing Kit (NEB, US) and  
159 incubated at 20°C for 5 minutes and 65°C for 5 minutes. From this, 1µl of DNA was  
160 used for barcode ligation using Native Barcoding Expansion 96 (Oxford Nanopore  
161 Technology, UK) and NEBNext Ultra II Ligation Module reagents (NEB, US).  
162 Incubation was performed at 20°C for 20 minutes and at 65°C for 10 minutes. This  
163 step was eventually modified to employ NEBNext Blunt/TA Ligase Master Mix (NEB,  
164 US) using the same barcodes and incubation conditions.

165 The barcoded samples were pooled together. The pooled and barcoded DNA  
166 samples were cleaned using 0.4X AMPure XP beads followed by two ethanol (80%)  
167 washes and eluted in a 1/14 of the original volume of nuclease-free water. Adapter  
168 ligation was performed using 50-100 ng of the barcoded amplicon pool, NEBNext  
169 Quick Ligation Module reagents (NEB, US) and Adaptor Mix II (ONT, UK), and  
170 incubated at room temperature for 20 minutes. Final clean-up was performed using  
171 1X AMPure XP beads and 125 µl of Short Fragment Buffer (ONT, UK). The library  
172 was eluted in 15 µl Elution Buffer (ONT, UK). The final library was normalised to 15-  
173 70 ng, loaded on a SpotON R9 flow cell and sequenced on a MinION Mk1B or  
174 GridION device<sup>6</sup>.

175

## 176 **SARS-CoV-2 genome consensus assembly**

177 The data generated via the MinION and GridION devices were processed  
178 using the ARTIC bioinformatic protocol ([https://artic.network/ncov-2019/ncov2019-  
179 bioinformatics-sop.html](https://artic.network/ncov-2019/ncov2019-bioinformatics-sop.html)). In brief, raw FAST5 files were base called and  
180 demultiplexed using ONT's Guppy (version 4.0.5) in high accuracy mode using a  
181 minimum Q score of 7. FASTQ reads between 300 bps and 750 bps were filtered  
182 using the guppyplex module. The consensus sequences were generated by aligning  
183 base called reads against the SARS-CoV-2 reference genome (GenBank accession  
184 MN908947.3) using MiniMap2<sup>7</sup>. All positions with a genome coverage of less than 20  
185 reads were masked with Ns. The consensus sequences were then polished using  
186 Nanopolish toolkit (version 0.13.3) using the raw signals.

## 187 **Lineage and VOC assignment**

188 Additional quality control, clade assignment and mutation profiles were  
189 obtained using the NextClade tool v1.13.2<sup>8</sup> using a SARS-CoV-2 reference genome  
190 (accession NC\_045512). All consensus sequences with a genome coverage >70%  
191 were classified using the PANGO lineage assignment tool (Pangolin version 3.1.20  
192 and PangoLearn v.02/02/2022)<sup>9</sup>.

193

## 194 **Global comparison sequences**

195 Seychelles sequences were analysed against a backdrop of globally  
196 representative SARS-CoV-2 lineages. To ensure global representation of  
197 sequences, we downloaded all the sequences (n= 8,916,634) from the Global  
198 Initiative on Sharing All Influenza Data (GISAID) database collected before 31<sup>st</sup>  
199 December and used an in-house R script to randomly select a sub-sample of 5,179  
200 genomes while considering Pango lineage (lineages detected in Seychelles only),  
201 continent and date of collection. These global random genomes were collected from  
202 150 countries and territories between 2<sup>nd</sup> May 2020 and 31<sup>st</sup> December 2021.

203

## 204 **Phylogenetic reconstruction**

205 The retrieved global sequence dataset, the sequences from Seychelles were  
206 aligned using Nextalign version 1.4.1. against the reference SARS-CoV-2 genome  
207 (accession NC\_045512). A maximum likelihood (ML) phylogeny was inferred using  
208 IQTREE version 2.1.3 (<http://www.iqtree.org/>). The software initiates tree  
209 reconstruction after assessment and selection of the best model of nucleotide  
210 substitution for the alignment. TreeTime version 0.8.1 was used to transform the ML  
211 tree topology into a time calibrated phylogenetic tree. The resulting trees were  
212 visualized using the Bioconductor ggTree version 2.2.4 package<sup>10</sup> in R<sup>11</sup>.

213

## 214 **Estimation of virus importations and exportations into Seychelles**

215 The global ML tree topology was used to estimate the number of viral  
216 transmission events between Seychelles and the rest of the world as described  
217 previously<sup>12</sup>. TreeTime was used to transform the ML tree topology into a dated  
218 phylogenetic tree. Outlier sequences (n=208) were identified by TreeTime and  
219 excluded during this process. A migration model was fitted using the time-scaled  
220 phylogenetic tree, mapping the location status of the genomes from Seychelles at



221 both the tips and internal nodes. Using the date and location annotated tree  
222 topology, we counted the number of transitions between Seychelles and the rest of  
223 the world and plotted this using ggplot2 version 3.3.3<sup>13</sup>.

224

## 225 **Statistical analysis**

226 All statistical analyses were performed using R version 4.1.0<sup>11</sup> .

## 227 RESULTS

### 228 Sequenced COVID-19 cases in Seychelles

229 The rise of COVID-19 cases in 2021 was preceded by a period of relaxed  
230 countermeasures to curb the spread of the virus (**Figure 1 A and B**). Of 1,298 SARS-  
231 CoV-2 positive samples received at KWTRP for genome sequencing, near complete  
232 genomes (>70% genome coverage) were recovered from 1,056 samples, and these  
233 were used in the subsequent lineage and phylogenetic analysis (**Supplementary**  
234 **Figure 2**). A summary of the demographic details for the samples successfully  
235 sequenced and those that failed are provided in **Table 1**.

236

### 237 SARS-CoV-2 lineages circulating in Seychelles

238 The recovered 1,056 genomes were classified into 32 distinct Pango lineages,  
239 28 of which occurred within VOC, VOI or VUM: Alpha VOC (n=1), Beta VOC (n=1),  
240 Delta VOC (n=21) and Omicron VOC (n=3) and Kappa VOI (n=1) and B.1.640.2  
241 VUM (n=1) (**Table 2**). A total of four non-VOC/non-VOI/non-VUM lineages were  
242 detected among the sequenced infections in Seychelles: B.1 (n=9), B.1.1 (n=1),  
243 B.1.1.50 (n=1) and lineage B.1.1.277 (n=1). Lineage B.1 (predominantly detected in  
244 Europe) was the first lineage to be detected in Seychelles, in a sequenced sample  
245 from June 2020, followed by lineage B.1.1.277 (predominantly detected in Europe) in  
246 October 2020, B.1.1.50 (Predominantly detected in Israel and Palestine) in January  
247 2021 followed by B.1.1 in May 2021. The non-VOC/VOI lineages were replaced by  
248 the Beta VOC (B.1.351) in February 2021, and which was later subsequently  
249 replaced by the Delta VOC in May 2021 that dominated until November 2021 when  
250 Omicron cases were first identified (**Figure 1C and Figure 2**).

251 Detection of Beta VOC in February 2021 coincided with the start of a surge of  
252 COVID-19 cases, with a further sharp surge observed in May 2021 coinciding with  
253 detection of Delta VOC in May 2021 (**Figure 1B and C**). Since the emergence of  
254 Delta VOC in Seychelles in May 2021, a total of 21 Delta VOC lineages co-circulated  
255 with varying frequency. Lineage AY.122 (n= 742) was the most prevalent, with  
256 detections until the end of the surveillance period covered in this analysis (**Figure 1D**  
257 **and Figure 2**). Other common Delta lineages were AY.43 (n=33) and B.1.617.2  
258 (n=13 ). We observed the start of another surge in November 2021 due to Omicron

259 (lineages BA.1 (n=126), BA.1.1 (n=18) and BA.2 (n=1) (**Figure 1B and**  
260 **Supplementary Figure 1A**) which peaked in mid-January 2022 (not shown).

261

### 262 **SARS-CoV-2 diversity in Seychelles**

263 Genetic distance-resolved phylogeny of the Seychelles genomes, including  
264 global reference sequences (n=5,179) revealed that most of the Seychelles  
265 sequences were interspersed as clusters (>2 sequences) or singletons across the  
266 phylogenetic trees suggesting multiple viral introductions into Seychelles (**Figure 3**).  
267 In the VOC/non-VOC-specific phylogenies, Delta VOC (n=863) grouped into 14  
268 clusters (>2 sequences) clusters and 12 singletons on the global phylogenetic tree  
269 pointing to separate introductions of the Delta VOC into the country whereas  
270 Omicron VOC (n=145) clustered into 10 clusters and 11 singletons (**Figures 3D and**  
271 **E**). Seychelles' Beta (n=29) and Alpha (n=5) viruses clustered closely amongst  
272 themselves suggesting few introductions that led to onward transmission in  
273 Seychelles (**Figures 3B and C**). Seychelles B.1 viruses sampled in 2020 were  
274 dispersed on the global phylogeny as singletons most likely pointing to multiple  
275 introductions into Seychelles during the initial phase of the pandemic (**Figure 3A**).  
276 Sequences from different locations (i.e., districts) in Seychelles clustered closely or  
277 together on the phylogenetic tree, a feature suggesting rapid spread of the virus  
278 within the country over a short period of time (not shown).

279 SARS-CoV-2 variant analysis comparing sequences from Seychelles'  
280 sequences to the Wuhan reference sequence (NC\_045512.2) detected a total of 703  
281 amino acid mutations across different gene regions; however, focusing on the  
282 frequent occurring mutations only, we identified a total of 27 amino acid mutations  
283 and two deletions that had a prevalence of >50% in the sequenced cases  
284 (**Supplementary Figure 3A and B**). The most prevalent amino acid mutation was  
285 D614G (A23403G) (98.9%) occurring in the spike glycoprotein followed by P314L  
286 (C14408T) (93.3%) in the open reading frame 1b (ORF1b) (**Supplementary Figure**  
287 **3A**).

288

### 289 **Export and import of SARS-CoV-2 lineages in Seychelles**

290 Ancestral location state reconstruction of the dated global phylogeny (**Figure**  
291 **4A**) was used to infer the number of viral importations and exportations. In total,  
292 between the 25<sup>th</sup> June 2020 and the 31<sup>st</sup> December 2021, we inferred at least 78

293 importations into Seychelles with 28 (35%) of the introductions coming from Europe,  
294 21 separate introductions from Africa, 15 separate introductions from Asia, 6  
295 introductions from North America, 5 separate introductions from Oceania and 3  
296 introductions from South America. **(Figure 4B)**. Of the 78 detected viral imports into  
297 Seychelles, 66 occurred between January and December 2021 after the rise in  
298 COVID-19 cases was experienced in the Seychelles **(Figure 4C)**. From the analysis,  
299 we also inferred 32 export events from Seychelles to the rest of the world, mainly  
300 Asia (n=10) Europe (n=8) and Africa (n=6).

301

## 302 **DISCUSSION**

303 We estimated at least 78 independent introductions of SARS-CoV-2 into  
304 Seychelles between 25<sup>th</sup> June 2020 to 31<sup>st</sup> December 2021, with the importations  
305 likely originating from all the continents in the world. Notably, the surge of COVID-19  
306 cases from January to December 2021 was characterised by detections of VOCs in  
307 the country. The Beta variant of concern was the dominant strain in circulation from  
308 February to April 2021 and probably responsible for the surge in cases in January  
309 2021 (highest daily number of infections at 231, on the 4<sup>th</sup> March 2021), but the  
310 introduction and rapid spread of the Delta variant seen from May to December 2021  
311 caused a further surge (highest daily number of infections at 484, on the 6<sup>th</sup> May  
312 2021).

313 The low number of cases detected for non-VOCs (B.1, B.1.1, B.1.1.50 and  
314 B.1.1.277) lineages in 2020, could be explained by the fact that this insular  
315 population experienced very low importations due to the COVID-19 restriction  
316 countermeasures that were in place in 2020 but also that the non-VOCs were not  
317 highly transmissible. We ascertain that the introduction of the VOCs with high  
318 transmissibility was probably the cause of the surge of cases in Seychelles in 2021.  
319 However, these assertions should be taken with caution since extensive genomic  
320 surveillance in the country began in early 2021. To note, the detection of VOCs in  
321 the country preceded period of relaxed COVID-19 restriction countermeasures,  
322 including allowing tourists into the country and the resumption of in person school  
323 classes. This may have led to increased viral importations, as detected in our  
324 dataset, and to spread in the country.

325 The detection of Delta VOCs in May 2021 coincided with a period of relaxed  
326 COVID-19 restriction countermeasures (Oxford stringency index < 50) and the surge  
327 of cases during this time may have been due to multiple introductions and rapid  
328 spread of the virus in the country. By December, a total of 21 different Delta lineages  
329 were detected in Seychelles. The first Omicron detection in Seychelles was on the  
330 29<sup>th</sup> of November 2021. By 31st December 2021, three Omicron lineages had been  
331 detected in Seychelles including BA.2 which has been noted to be rapidly growing  
332 across the world<sup>14-16</sup>

333 Unsurprisingly, the majority of the Seychelles sequences harboured important  
334 spike mutations e.g., D614G mutation occurring in 98.2% of all the sequenced  
335 cases. The D614G amino acid change has been associated with stronger interaction  
336 between the virus and the angiotensin-converting enzyme 2 (ACE2) affinity, leading  
337 to higher infectivity and transmissibility<sup>17,18</sup>. Other important mutations included : i.  
338 Beta VOC; K417N, E484K and N501Y occurring in the spike receptor binding  
339 domain (RBD), which have been associated with reduced sensitivity to convalescent  
340 and post-vaccination sera<sup>19</sup>; ii. Delta VOC, L452R, P681R and D950N mutations,  
341 which have been linked to reduced sensitivity to neutralizing antibodies and higher  
342 transmissibility<sup>20</sup>; iii. Alpha VOC; N501Y and P681H mutations and iv. Omicron  
343 VOC: Q498R and N501Y occurring in the RBD have been linked to ACE2 binding  
344 affinity<sup>21</sup>. These RBD mutations coupled with four amino acid substitutions (i.e.,  
345 A67V, T95I, and L212) and three deletion (67-70, 142-144 and 211) and an  
346 insertion (EPE at position 214) in the N-terminal domain (NTD) are linked to reduced  
347 sensitivity of Omicron to reduced sensitivity to convalescent and post-vaccination  
348 sera<sup>22,23</sup>. A cluster of three mutations occurring at S1-S2 furin cleavage site (H655Y,  
349 N679K and P681H) have been associated with increased transmissibility<sup>24</sup>.

350 Our phylogenetic analysis showed that Seychelles sequences virus diversity  
351 was nested within the global virus diversity (i.e., Seychelles sequences clustered  
352 with sequences sampled from different countries, suggestive of global spread of  
353 SARS-CoV-2 lineages). The close association between the viruses and those from  
354 other countries reflects global transmission of the virus as a result of global  
355 migration, increased connectivity, and social mixing. Further, focusing on the VOCs,  
356 we observed patterns of SARS-CoV-2 viral diversity inside Seychelles; phylogenetic

357 clusters consisted of viruses which were derived from different geographic locations  
358 and formed a deep hierarchical structure, indicating an extensive and persistent  
359 nation-wide transmission of the virus.

360 Our findings are consistent with findings from Island countries such as  
361 Comoros, Reunion and New Zealand, where these countries were able to contain  
362 the first pandemic wave starting in March 2020, due COVID-19 strict  
363 countermeasures such as ban on international arrivals, which may have led to  
364 limited viral introductions into the islands, or perhaps viral introductions during the  
365 early phase of the pandemic did not results to community transmission due to  
366 government countermeasure on COVID-19 such as countrywide lockdown or self-  
367 isolation of the entire population<sup>25,26</sup>. Surge of COVID-19 cases in Islandic  
368 populations appears to be majorly driven by introductions of VOCs. For example,  
369 Comoros seems to have experienced its first surge of COVID-19 cases after  
370 introduction of Beta VOCs into the population in January 2021<sup>27</sup>, similar to the period  
371 when Seychelles saw its first surge also due Beta VOC.

372 This study had some limitations. First, our import/export inferences can be  
373 influenced by sampling biases and the low rate of sequencing in Seychelles.  
374 Therefore, the true number of international introductions are likely significantly higher  
375 than what is reported here. Second, incomplete metadata for some samples limited  
376 the scope of our analysis, for example, lack of location of samples collected  
377 disallowed us to investigate the transmission pathway of viruses within the country.  
378 Third, SARS-CoV- 2 sequences from Seychelles are only available from a very small  
379 fraction of the number of confirmed cases into the country.

380 These data reinforce the importance of genomic surveillance in Seychelles as  
381 a tool for monitoring and providing real-time information on spread of emerging  
382 SARS-CoV-2 variants in the population with important implications for public health  
383 and immunization strategies. Surge of COVID-19 cases due to VOCs during a period  
384 of heightened COVID-19 countermeasures raises questions on the optimal timing of  
385 the introduction of public health interventions. When the interventions are introduced  
386 after a surge has started, it is often too late, and the control strategies should focus  
387 on local transmission to understand characteristics and origins of locally circulating  
388 SARS-CoV-2 diversity to prevent further spread<sup>28</sup>. Moreover, studies on genomic

389 surveillance would also be useful in investigating vaccine effectiveness against  
390 circulating variants which appear to have a high turnover.

## 391 REFERENCES

392

- 393 1. National Bureau of Statistics S. Population and Vital Statistics. Mid 2021  
394 Population Estimates. Published August 31, 2021. Accessed March 29, 2022.  
395 [https://www.nbs.gov.sc/downloads/data-acquisition-census/population-and-](https://www.nbs.gov.sc/downloads/data-acquisition-census/population-and-vital-statistics/2021)  
396 [vital-statistics/2021](https://www.nbs.gov.sc/downloads/data-acquisition-census/population-and-vital-statistics/2021)
- 397 2. WHO. WHO Coronavirus (COVID-19) Dashboard.
- 398 3. Centres for Disease Control and Prevention. SARS-CoV-2 Variant  
399 Classifications and Definitions.
- 400 4. WHO. Tracking SARS-CoV-2 variants. Published 2021. Accessed August 27,  
401 2021. <https://www.who.int/en/activities/tracking-SARS-CoV-2-variants/>
- 402 5. Tao K, Tzou PL, Nouhin J, et al. The biological and clinical significance of  
403 emerging SARS-CoV-2 variants. *Nature Reviews Genetics*. 2021;22(12):757-  
404 773. doi:10.1038/s41576-021-00408-x
- 405 6. Tyson JR, James P, Stoddart D, et al. Improvements to the ARTIC multiplex  
406 PCR method for SARS-CoV-2 genome sequencing using nanopore. *bioRxiv*.  
407 Published online September 4, 2020:2020.09.04.283077.  
408 doi:10.1101/2020.09.04.283077
- 409 7. Li H. Minimap2: pairwise alignment for nucleotide sequences. *Bioinformatics*.  
410 2018;34(18):3094-3100. doi:10.1093/bioinformatics/bty191
- 411 8. Hadfield J, Megill C, Bell SM, et al. Nextstrain: real-time tracking of pathogen  
412 evolution. *Bioinformatics*. 2018;34(23):4121-4123.  
413 doi:10.1093/bioinformatics/bty407
- 414 9. O'Toole Á, Scher E, Underwood A, et al. Assignment of epidemiological  
415 lineages in an emerging pandemic using the pangolin tool. *Virus Evolution*.  
416 2021;7(2):veab064. doi:10.1093/ve/veab064
- 417 10. Yu G, Smith DK, Zhu H, Guan Y, Lam TTY. ggtree: an r package for  
418 visualization and annotation of phylogenetic trees with their covariates and  
419 other associated data. *Methods in Ecology and Evolution*. 2017;8(1):28-36.  
420 doi:<https://doi.org/10.1111/2041-210X.12628>
- 421 11. R Core Team. R: A language and environment for statistical computing.  
422 Published online 2013. Accessed November 9, 2021. URL [http://www.R-](http://www.R-project.org/)  
423 [project.org/](http://www.R-project.org/)



- 424 12. Eduan W, Marta G, Houriiyah T, et al. A year of genomic surveillance reveals  
425 how the SARS-CoV-2 pandemic unfolded in Africa. *Science* (1979).  
426 2021;374(6566):423-431. doi:10.1126/science.abj4336
- 427 13. Hadley Wickham. *Ggplot2: Elegant Graphics for Data Analysis*. Springer-  
428 Verlag; 2016.
- 429 14. Yamasoba D, Kimura I, Nasser H, et al. Virological characteristics of SARS-  
430 CoV-2 BA.2 variant. *bioRxiv*. Published online January 1,  
431 2022:2022.02.14.480335. doi:10.1101/2022.02.14.480335
- 432 15. Lyngse FP, Kirkeby CT, Denwood M, et al. Transmission of SARS-CoV-2  
433 Omicron VOC subvariants BA.1 and BA.2: Evidence from Danish Households.  
434 *medRxiv*. Published online January 1, 2022:2022.01.28.22270044.  
435 doi:10.1101/2022.01.28.22270044
- 436 16. Iketani S, Liu L, Guo Y, et al. Antibody Evasion Properties of SARS-CoV-2  
437 Omicron Sublineages. *bioRxiv*. Published online January 1,  
438 2022:2022.02.07.479306. doi:10.1101/2022.02.07.479306
- 439 17. Zhang L, Jackson CB, Mou H, et al. SARS-CoV-2 spike-protein D614G  
440 mutation increases virion spike density and infectivity. *Nature*  
441 *Communications*. 2020;11(1):6013. doi:10.1038/s41467-020-19808-4
- 442 18. Ozono S, Zhang Y, Ode H, et al. SARS-CoV-2 D614G spike mutation  
443 increases entry efficiency with enhanced ACE2-binding affinity. *Nature*  
444 *Communications*. 2021;12(1):848. doi:10.1038/s41467-021-21118-2
- 445 19. McCormick KD, Jacobs JL, Mellors JW. The emerging plasticity of SARS-CoV-  
446 2. *Science* (1979). 2021;371(6536):1306 LP - 1308.  
447 doi:10.1126/science.abg4493
- 448 20. Motozono C, Toyoda M, Zahradnik J, et al. SARS-CoV-2 spike L452R variant  
449 evades cellular immunity and increases infectivity. *Cell Host & Microbe*.  
450 Published online 2021. doi:<https://doi.org/10.1016/j.chom.2021.06.006>
- 451 21. Zahradnik J, Marciano S, Shemesh M, et al. SARS-CoV-2 variant prediction  
452 and antiviral drug design are enabled by RBD in vitro evolution. *Nature*  
453 *Microbiology*. 2021;6(9):1188-1198. doi:10.1038/s41564-021-00954-4
- 454 22. Iketani S, Liu L, Guo Y, et al. Antibody Evasion Properties of SARS-CoV-2  
455 Omicron Sublineages. *bioRxiv*. Published online January 1,  
456 2022:2022.02.07.479306. doi:10.1101/2022.02.07.479306

- 457 23. Cele S, Jackson L, Khoury DS, et al. Omicron extensively but incompletely  
458 escapes Pfizer BNT162b2 neutralization. *Nature*. 2022;602(7898):654-656.  
459 doi:10.1038/s41586-021-04387-1
- 460 24. Gong SY, Chatterjee D, Richard J, et al. Contribution of single mutations to  
461 selected SARS-CoV-2 emerging variants Spike antigenicity. *bioRxiv*.  
462 Published online January 1, 2021:2021.08.04.455140.  
463 doi:10.1101/2021.08.04.455140
- 464 25. Geoghegan JL, Ren X, Storey M, et al. Genomic epidemiology reveals  
465 transmission patterns and dynamics of SARS-CoV-2 in Aotearoa New  
466 Zealand. *Nature Communications*. 2020;11(1):6351. doi:10.1038/s41467-020-  
467 20235-8
- 468 26. Wilkinson DA, Lebarbenchon C, Atyame C, et al. Genomic insights into early  
469 SARS-CoV-2 strains isolated in Reunion Island. *medRxiv*. Published online  
470 January 1, 2021:2021.01.21.21249623. doi:10.1101/2021.01.21.21249623
- 471 27. N. Agoti C, Githinji G, S. Mohammed K, et al. Detection of SARS-CoV-2  
472 variant 501Y.V2 in Comoros Islands in January 2021 [version 1; peer review: 1  
473 approved]. *Wellcome Open Research*. 2021;6(192).  
474 doi:10.12688/wellcomeopenres.16889.1
- 475 28. Agoti CN, Ochola-Oyier LI, Mohammed KS, et al. Transmission networks of  
476 SARS-CoV-2 in coastal Kenya during the first two waves: a retrospective  
477 genomic study. *medRxiv*. Published online January 1,  
478 2021:2021.07.01.21259583. doi:10.1101/2021.07.01.21259583
- 479 29. Hannah Ritchie, Esteban Ortiz-Ospina, Diana Beltekian, Edouard Mathieu, Joe  
480 Hasell, Bobbie Macdonald, Charlie Giattino, Cameron Appel LRG and MR.  
481 Coronavirus Pandemic (COVID-19). *Our World in Data*. Published 2020.  
482 Accessed March 1, 2022. <https://ourworldindata.org/coronavirus>  
483  
484

485 **Acknowledgements**

486 We thank the Seychelles Ministry of Health, Public Health Laboratory, Africa-CDC,  
487 WHO-Afro, WHO-Kenya Office, WHO-Seychelles Office for facilitating sharing of  
488 SARS-CoV-2 samples that were sequenced. Further, we thanks all the laboratories  
489 that have shared SARS-CoV-2 sequence data in GISAID that we included as  
490 comparison data in our analysis (see list in appendix 1).

491

492 **Grant Information**

493 This works was supported by the National Institute for Health Research (NIHR)  
494 (project references 17/63/82 and 16/136/33) using UK aid from the UK Government  
495 to support global health research, The UK Foreign, Commonwealth and  
496 Development Office and Wellcome Trust (grant# 220985/Z/20/Z) The views  
497 expressed in this publication are those of the author (s) and not necessarily those of  
498 NIHR or the Department of Health and Social Care, Foreign Commonwealth and  
499 Development Office. This work was also supported by the Seychelles Public Health  
500 Laboratory (Public Health Authority), Africa-CDC, WHO-Afro, WHO-Seychelles,  
501 ASLM, and WHO-Kenya offices.

502

503 **Data availability**

504 All data generated and analysis script for this manuscript will be available from the  
505 Virus Epidemiology and Control, Kenya Medical Research Institute (KEMRI)–  
506 Wellcome Trust Research Programme data server,  
507 <https://doi.org/10.7910/DVN/AYT2UA>. Whole genome sequences are available from  
508 GISAID database accession number EPI\_ISL\_4880527 - EPI\_ISL\_4880796,  
509 EPI\_ISL\_5942854 - EPI\_ISL\_6705093, EPI\_ISL\_8424404 - EPI\_ISL\_8424612 and  
510 EPI\_ISL\_11060102 - EPI\_ISL\_11060407.

511

512 **Conflicts of Interest**

513 The authors have declared no competing interest.

514 **TABLES**

515

516 **Table 1** Demographic characteristics of SARS-CoV-2 positive samples received for sequencing at KWTRP. Sample were collected  
 517 between 14<sup>th</sup> March 2020 and 31<sup>st</sup> December 2021 (n = 1,298).

518

|                         | Sample sequenced |                           | Samples not sequenced |                           | Total |
|-------------------------|------------------|---------------------------|-----------------------|---------------------------|-------|
|                         | Number (n=1056)  | population proportion (%) | Number (n=242)        | population proportion (%) |       |
| <b>Sex</b>              |                  |                           |                       |                           |       |
| Female                  | 560              | 53.0                      | 120                   | 49.6                      | 680   |
| Male                    | 473              | 44.8                      | 102                   | 42.1                      | 575   |
| Unknown                 | 23               | 2.2                       | 20                    | 8.3                       | 43    |
|                         |                  |                           |                       |                           |       |
| <b>Age</b>              |                  |                           |                       |                           |       |
| Mean                    | 33.4 (18.3)      | -                         | 34.3 (20.4)           | -                         |       |
| Median                  | 32               | -                         | 34                    | -                         |       |
| Min, Max                | 0,98             | -                         | 0,89                  | -                         |       |
| Missing                 | 18               | 1.7                       | 9                     | 3.7                       | 27    |
|                         |                  |                           |                       |                           |       |
| <b>Age distribution</b> |                  |                           |                       |                           |       |
| 0–9                     | 106              | 10.0                      | 37                    | 15.3                      | 143   |
| 10–19                   | 132              | 12.5                      | 28                    | 11.6                      | 160   |

|                           |      |      |     |      |      |
|---------------------------|------|------|-----|------|------|
| 20–29                     | 215  | 20.4 | 30  | 12.4 | 245  |
| 30–39                     | 225  | 21.3 | 42  | 17.4 | 267  |
| 40–49                     | 146  | 13.8 | 45  | 18.6 | 191  |
| 50–59                     | 127  | 12.0 | 21  | 8.7  | 148  |
| 60–69                     | 58   | 5.5  | 19  | 7.9  | 77   |
| 70–79                     | 14   | 1.3  | 6   | 2.5  | 20   |
| >80                       | 15   | 1.4  | 5   | 2.1  | 20   |
|                           |      |      |     |      |      |
| <b>Travel information</b> |      |      |     |      |      |
| Yes                       | 3    | 0.3  | 8   | 3.3  | 11   |
| No                        | 1053 | 99.7 | 234 | 96.7 | 1287 |
|                           |      |      |     |      |      |
| <b>Symptoms</b>           |      |      |     |      |      |
| Asymptomatic              | 37   | 3.5  | 31  | 12.8 | 68   |
| Symptomatic               | 273  | 25.9 | 52  | 21.5 | 325  |
| Deceased                  | 3    | 0.3  | 4   | 1.7  | 7    |
| Missing                   | 738  | 69.9 | 155 | 64.0 | 893  |

519  
520  
521  
522  
523  
524

525 **Table 2.** Description of SARS-CoV-2 lineages observed in Seychelles, their global history and VOC/VOI status

526

| Non-VOC/VOI/VOC/VUM | Lineage   | Freq | Proportion (%) | Earliest date | Description                                                                  |
|---------------------|-----------|------|----------------|---------------|------------------------------------------------------------------------------|
| <b>Non-VOC/VOI</b>  | B.1       | 9    | 0.9            | 2020-01-01    | European lineage                                                             |
|                     | B.1.1     | 1    | 0.1            | 2020-01-01    | European lineage                                                             |
|                     | B.1.1.277 | 1    | 0.1            | 2020-03-07    | European lineage                                                             |
|                     | B.1.1.50  | 1    | 0.1            | 2020-03-29    | Predominantly found in Israel and Palestine                                  |
| <b>VUM</b>          | B.1.640.2 | 1    | 0.1            | 2021-10-15    | Predominantly found in France                                                |
| <b>Kappa VOI</b>    | B.1.617.1 | 1    | 0.1            | 2020-03-03    | Kappa variant of interest , Predominantly found in India lineage with 484Q   |
| <b>Alpha VOC</b>    | B.1.1.7   | 5    | 0.5            | 2020-02-07    | Alpha variant of concern, first identified in UK                             |
| <b>Beta VOC</b>     | B.1.351   | 29   | 2.7            | 2020-03-27    | Beta variant of concern, first identified in South Africa                    |
| <b>Delta VOC</b>    | B.1.617.2 | 13   | 1.2            | 2020-04-15    | Predominantly found in India                                                 |
|                     | AY.4      | 2    | 0.2            | 2020-08-03    | Predominantly found in UK                                                    |
|                     | AY.19     | 1    | 0.1            | 2021-04-07    | Predominantly found in South Africa                                          |
|                     | AY.33     | 4    | 0.4            | 2020-06-13    | Lineage circulating mostly in Belgium, Denmark, France, Netherlands, Germany |
|                     | AY.34     | 1    | 0.1            | 2020-11-18    | Predominantly found in UK                                                    |
|                     | AY.35     | 1    | 0.1            | 2020-08-21    | Predominantly found in lineage with spike E484Q circulating in USA           |
|                     | AY.38     | 1    | 0.1            | 2021-03-27    | Predominantly found in in South Africa                                       |
|                     | AY.39     | 4    | 0.4            | 2021-01-14    | Predominantly found in USA                                                   |
|                     | AY.43     | 33   | 3.1            | 2021-08-21    | Predominantly found in European                                              |
|                     | AY.44     | 2    | 0.2            | 2020-05-11    | Predominantly found in USA                                                   |
|                     | AY.46     | 8    | 0.8            | 2021-10-15    | Predominantly found in Africa                                                |
|                     | AY.58     | 5    | 0.5            | 2021-03-16    | Predominantly found in Italy                                                 |

|                    |        |     |      |            |                                                              |
|--------------------|--------|-----|------|------------|--------------------------------------------------------------|
|                    | AY.61  | 15  | 1.4  | 2021-01-07 | Predominantly found in Italy                                 |
|                    | AY.75  | 1   | 0.1  | 2021-01-06 | Predominantly found in USA                                   |
|                    | AY.112 | 5   | 0.5  | 2020-12-05 | Predominantly found in India                                 |
|                    | AY.116 | 11  | 1.0  | 2021-01-21 | Africa lineage                                               |
|                    | AY.121 | 7   | 0.7  | 2021-01-24 | Predominantly found in Turkey                                |
|                    | AY.122 | 742 | 70.3 | 2020-09-07 | European lineage                                             |
|                    | AY.124 | 1   | 0.1  | 2021-01-09 | Predominantly found in Portugal and other European countries |
|                    | AY.127 | 4   | 0.4  | 2020-12-10 | Predominantly found in India                                 |
|                    | AY.133 | 2   | 0.2  | 2021-02-10 | Predominantly found in France                                |
| <b>Omicron VOC</b> | BA.1   | 18  | 1.7  | 2021-09-10 | Predominantly found in UK                                    |
|                    | BA.1.1 | 126 | 11.9 | 2021-09-13 | Predominantly found in USA                                   |
|                    | BA.2   | 1   | 0.1  | 2021-11-17 | Predominantly found in UK                                    |

527

528 **FIGURE LEGENDS**

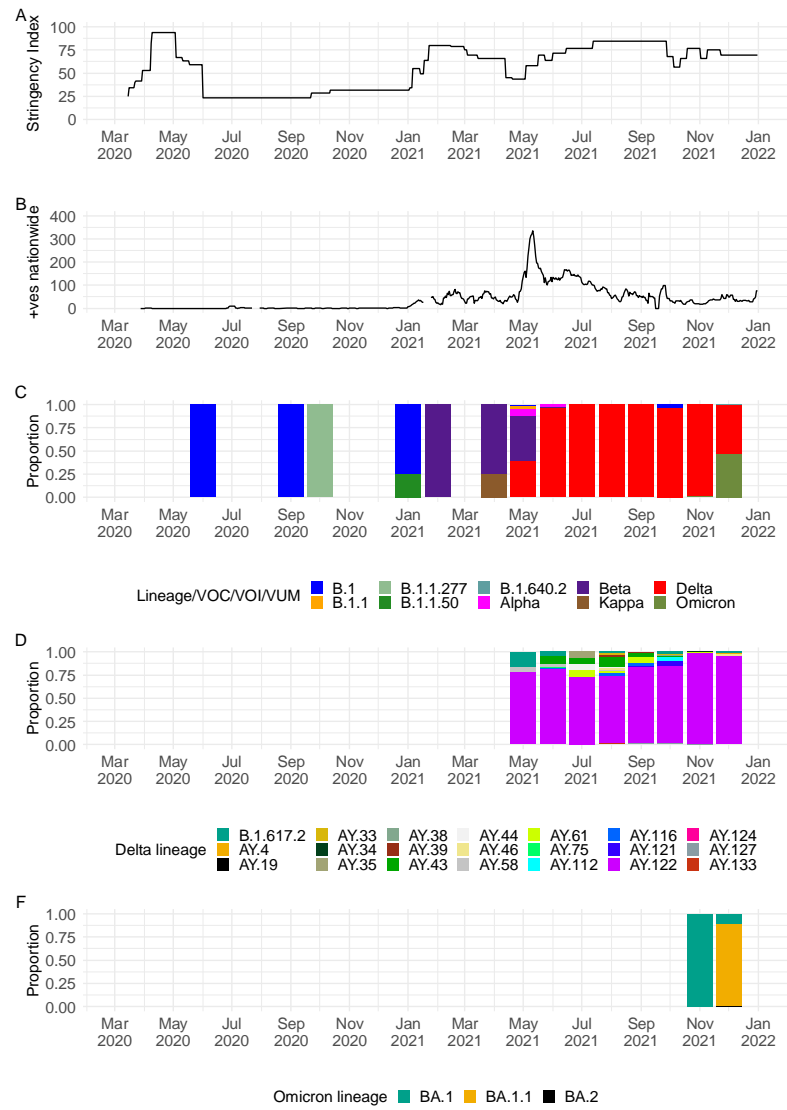

529  
 530 **Figure 1** A Seychelles government intervention levels as measured by the Oxford  
 531 stringency index <sup>29</sup>. B An epidemic curve for Seychelles derived from the daily  
 532 positive case numbers obtained from  
 533 <https://ourworldindata.org/coronavirus/country/seychelles>. C Monthly temporal  
 534 pattern of SARS-CoV-2 lineages and variants in Seychelles among the 1,056  
 535 samples sequenced from COVID-19 positive cases from the Seychelles (25<sup>th</sup> June  
 536 2020, to 31<sup>st</sup> December 2021). D Monthly temporal distribution of Delta VOC  
 537 lineages among samples sequenced from COVID-19 positive cases from the  
 538 Seychelles (25<sup>th</sup> June 2020, to 31<sup>st</sup> December 2021). E Monthly temporal distribution  
 539 of Omicron VOC lineages among samples sequenced from COVID-19 positive cases  
 540 from the Seychelles (25<sup>th</sup> June 2020, to 31<sup>st</sup> December 2021).



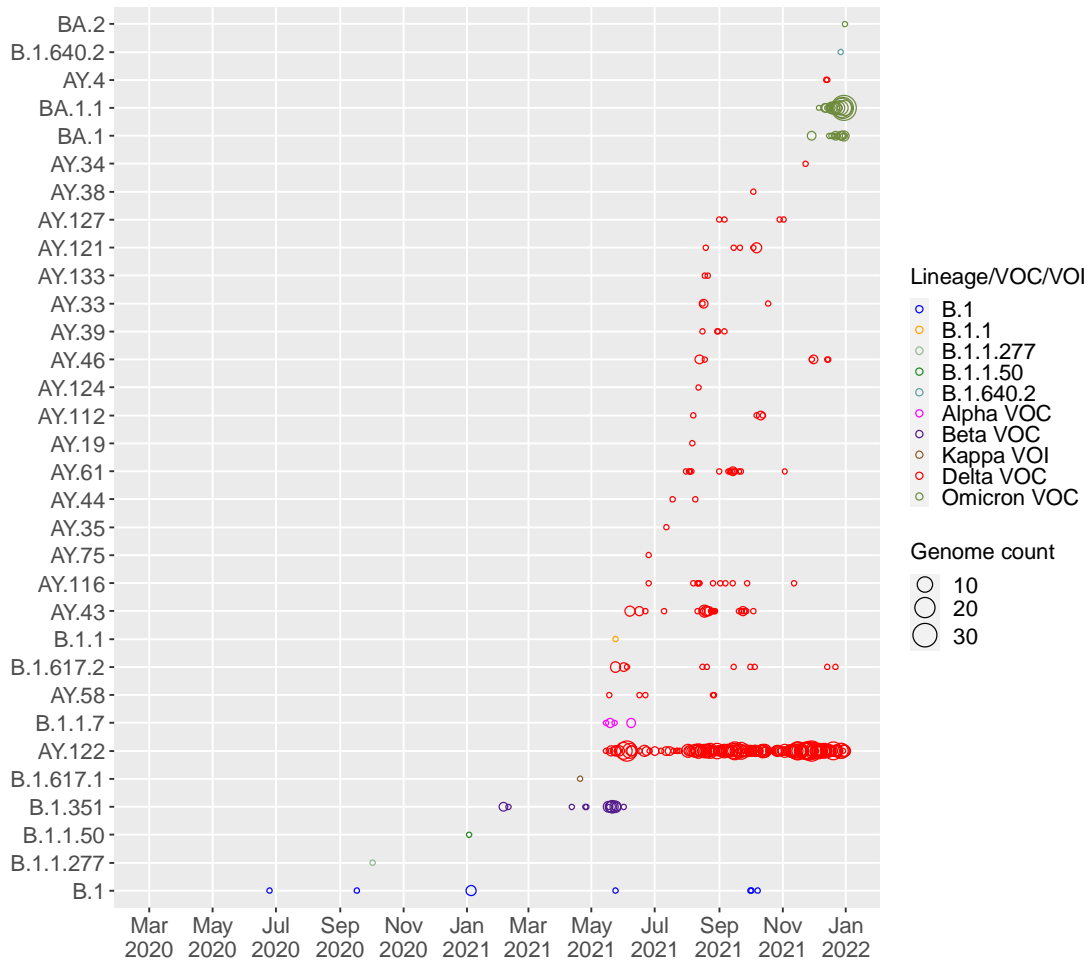

541

542 **Figure 2** SARS-CoV-2 Pango lineages in the sequenced 1,056 Seychelles samples

543 and timing of detections (circle size scaled by number of daily detections).

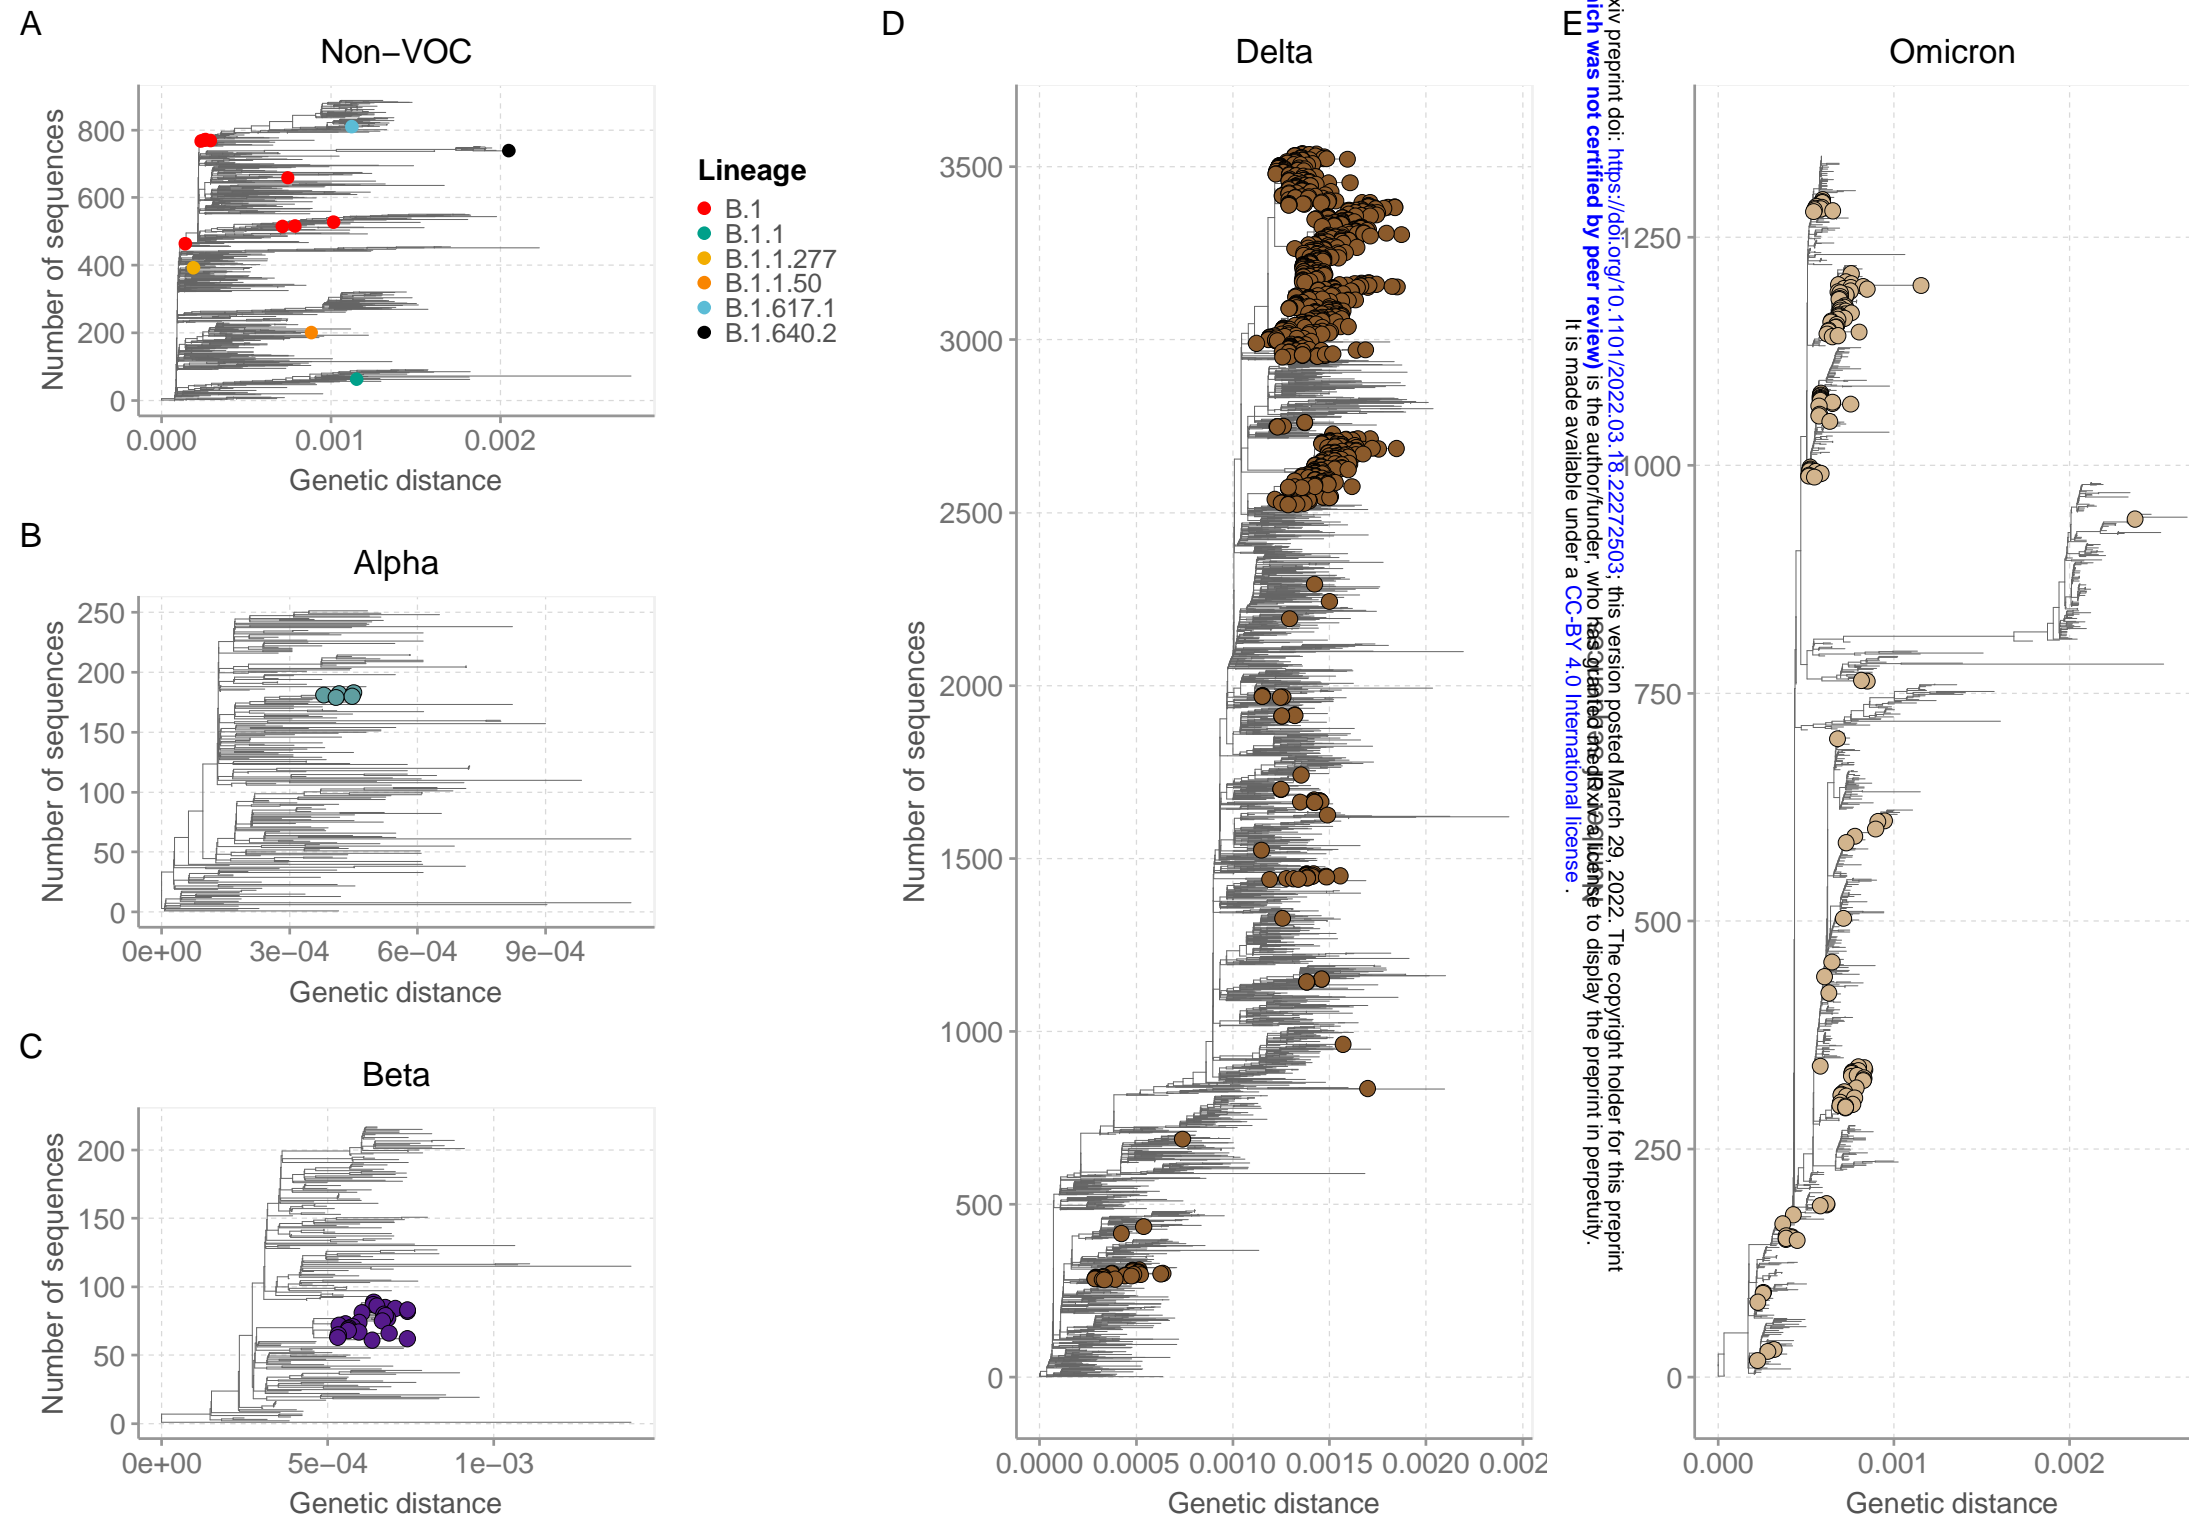

544

545 **Figure 3** Genetic distance-resolved lineage-specific phylogenetic trees for Omicron, Alpha, Beta, Delta VOC, and Non-VOC. Seychelles genomes are indicated with colored tip labels. **A** Phylogeny  
 546 of Delta VOC that combined 863 Seychelles sequences and 2,676 global sequences. **B** Phylogeny of Omicron VOC that combined 145 Seychelles sequences and 1,195 global sequences **C**  
 547 Phylogeny of Alpha VOC that combined 5 Seychelles sequences and 246 global sequences. **D** Phylogeny of Beta VOC that combined 29 Seychelles sequences and 187 global sequences. **E**  
 548 Phylogeny of Non-VOC that combined 14 Seychelles sequences and 875 global sequences.

549

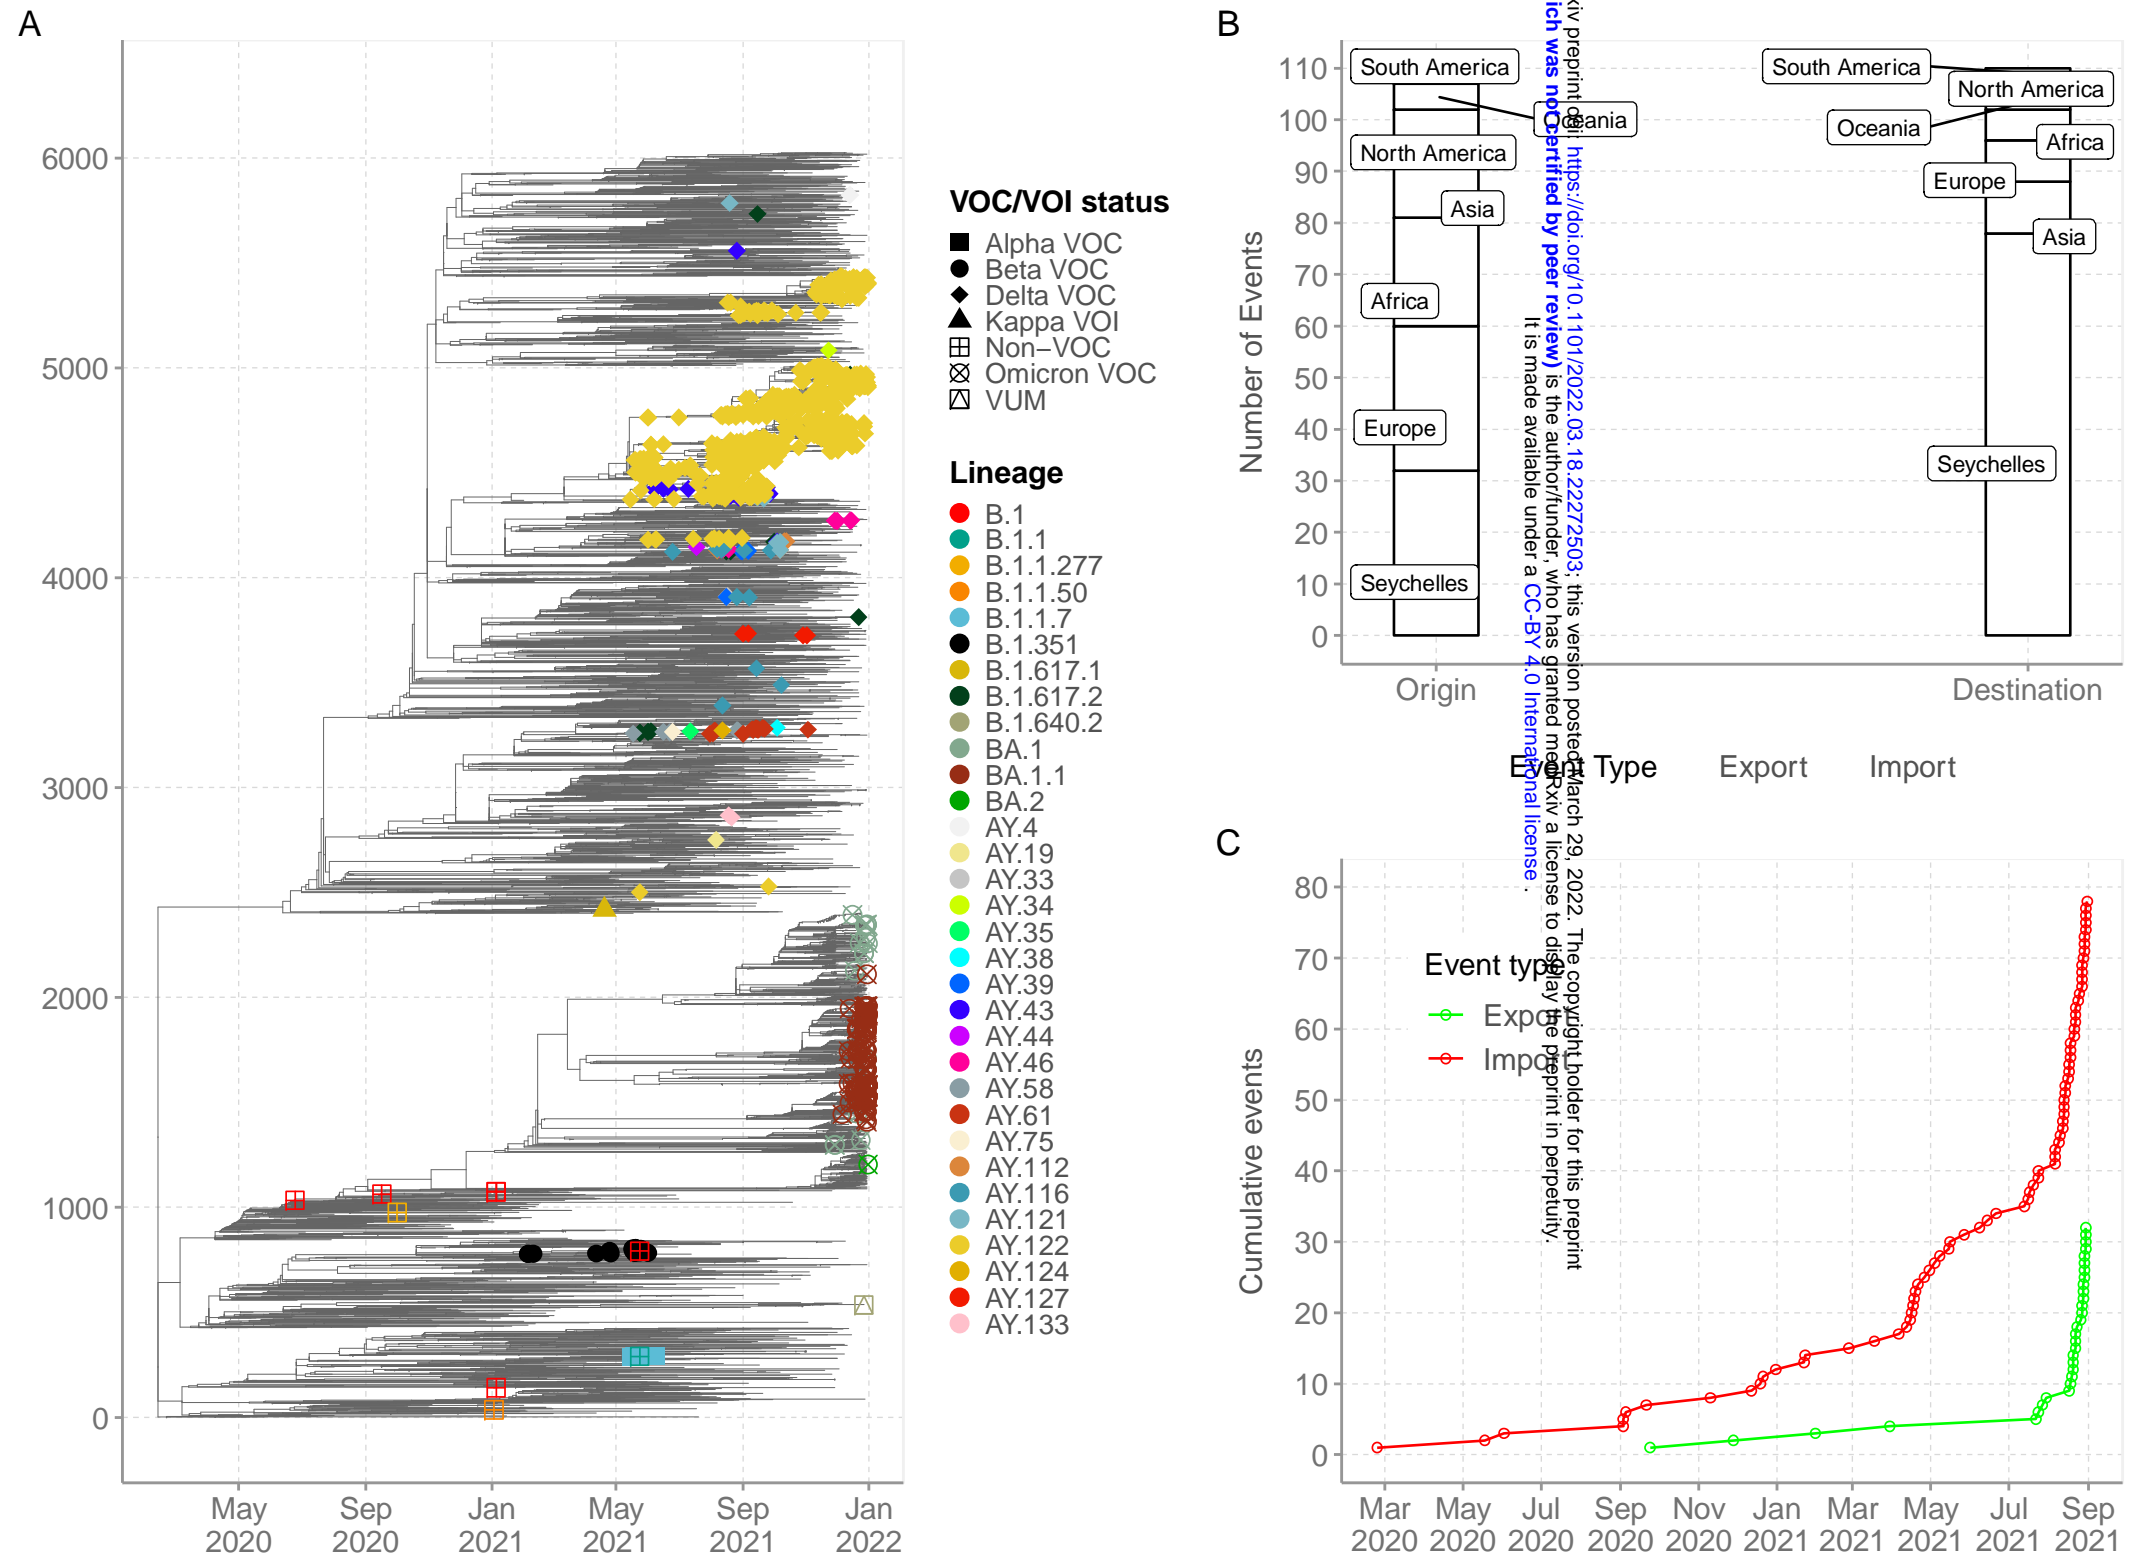

550

551 **Figure 4 A.** Time-resolved global phylogeny that combined 1,056 Seychelles sequences (coloured tip labels) and 5,179 global reference sequences. **B** The number of viral imports and exports into

552 and out of Seychelles. **C** Cumulative number of viral imports and export over time into Seychelles.

553 **SUPPLEMENTARY FIGURES**

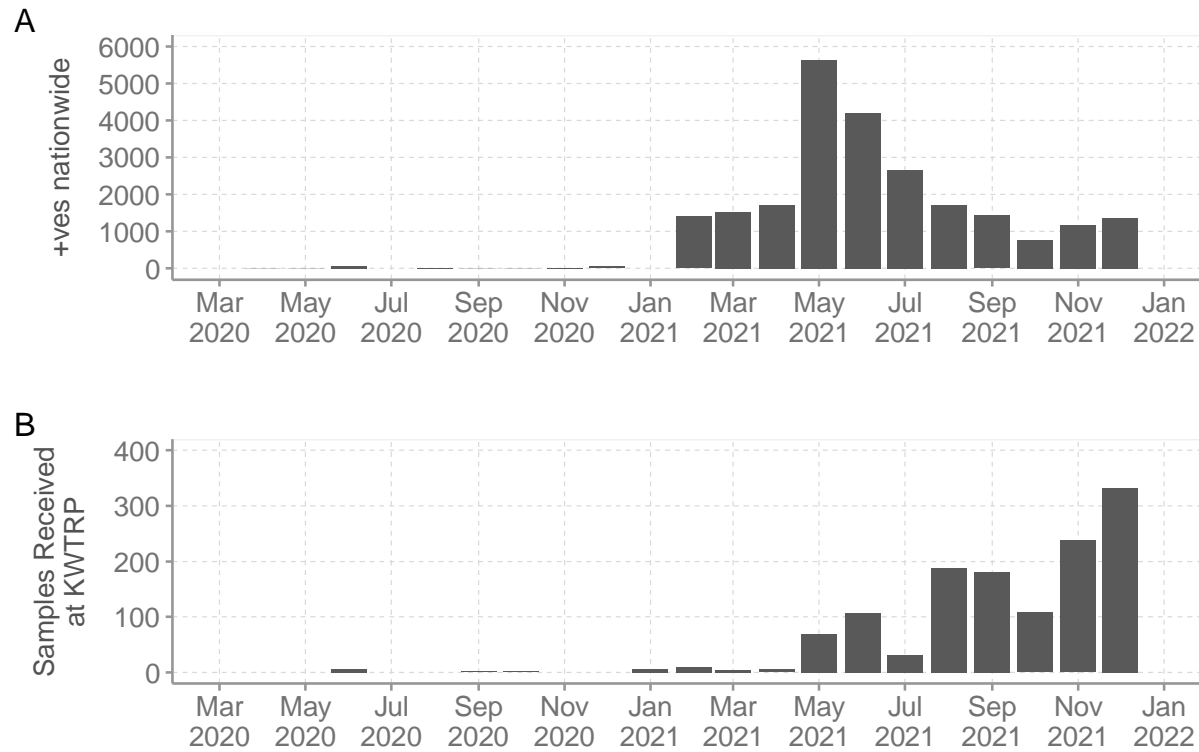

554

555

556 **Supplementary Figure 1 A** The monthly temporal distribution of SARS-CoV-2 cases between March 2020 and 31<sup>st</sup> December

557 2021 in Seychelles vs SARS-CoV-2 positives samples received at KEMRI-WT for whole genome sequencing.

558

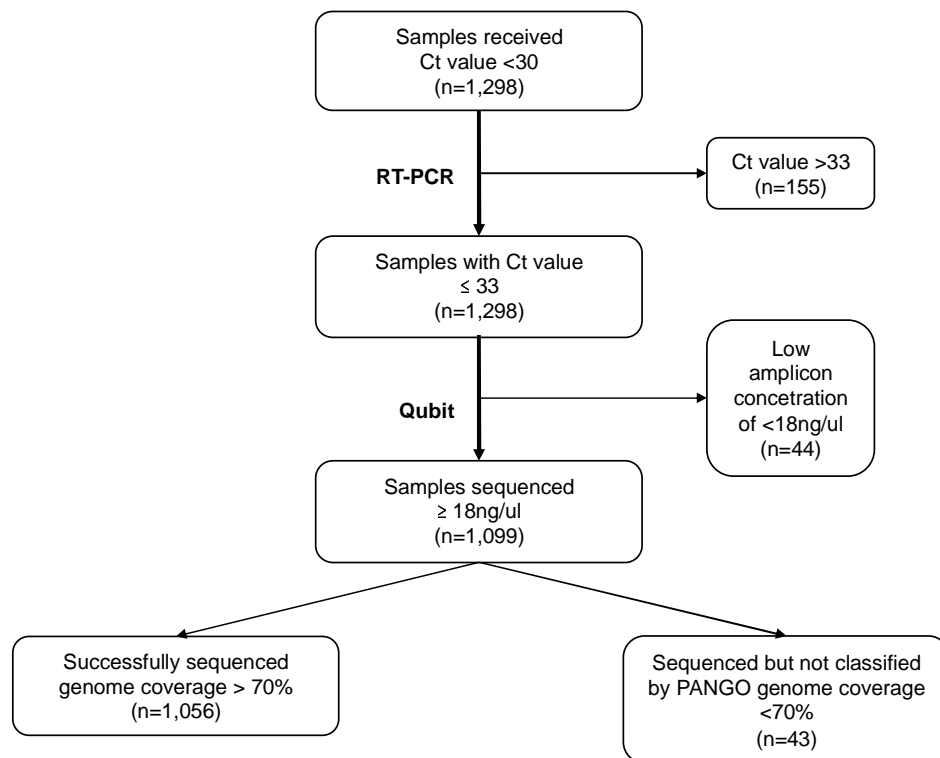

559

560

561 **Supplementary Figure 2** Flow chart describing processing of SARS-CoV-2  
562 samples received at KEMRI-WT for whole genome sequencing.

563

564

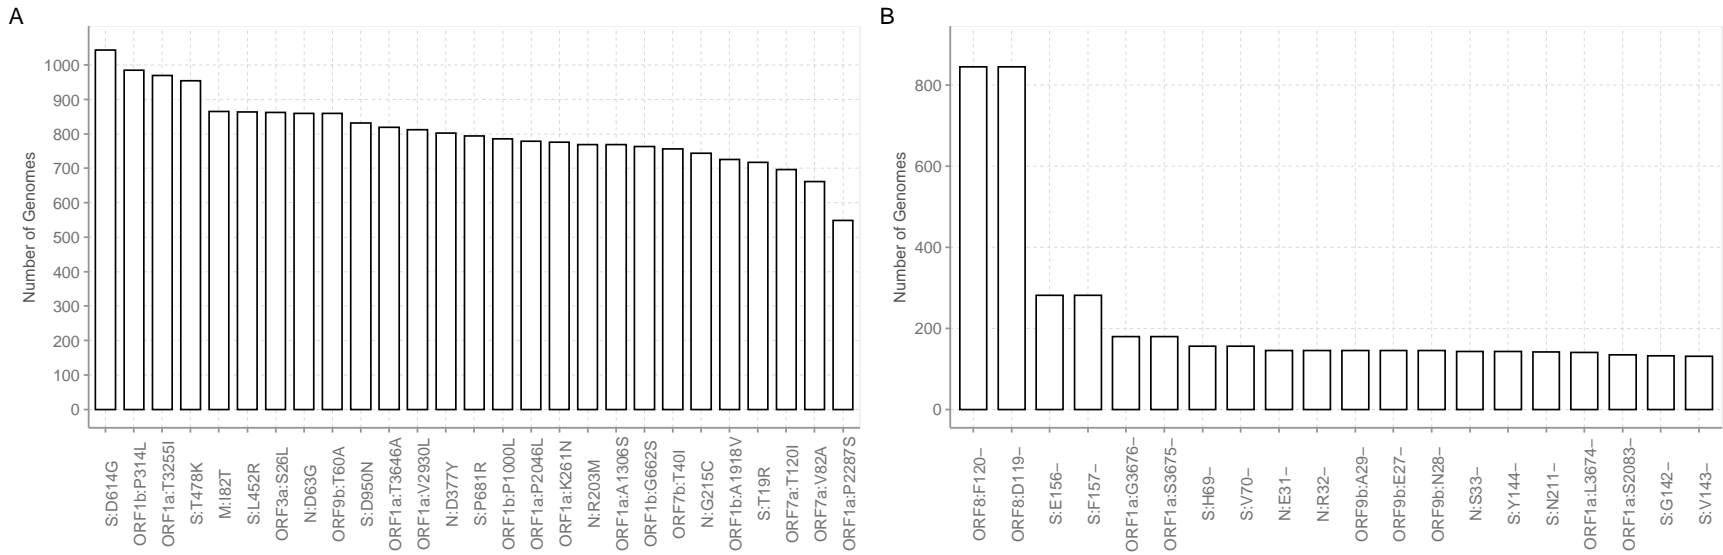

565

566

567 **Supplementary Figure 3** **A** Prevalent amino acid mutation among the 1,056 genomes from Seychelles. **B** Prevalent amino acid  
 568 deletions among the 1,056 genomes from Seychelles.

569

570
