# Supplementary material for: Genomic Epidemiology of SARS-CoV-2 in Seychelles, 2020-2021
Source: bioRxiv or medRxiv preprint supplement (doi:10.1101/2022.03.18.22272503), 2022-03-29
Supplement: Supplementary file [file media-2.pdf]

Samples received  
Ct value <30  
(n=1,298)

**RT-PCR**

Ct value >33  
(n=155)

Samples with Ct value  
≤ 33  
(n=1,298)

**Qubit**

Low  
amplicon  
concentration  
of <18ng/ul  
(n=44)

Samples sequenced  
≥ 18ng/ul  
(n=1,099)

Successfully sequenced  
genome coverage > 70%  
(n=1,056)

Sequenced but not classified  
by PANGO genome coverage  
<70%  
(n=43)
