# Supplementary material for: Genomic Epidemiology of SARS-CoV-2 in Seychelles, 2020-2021
Source: bioRxiv or medRxiv preprint supplement (doi:10.1101/2022.03.18.22272503), 2022-03-29

A

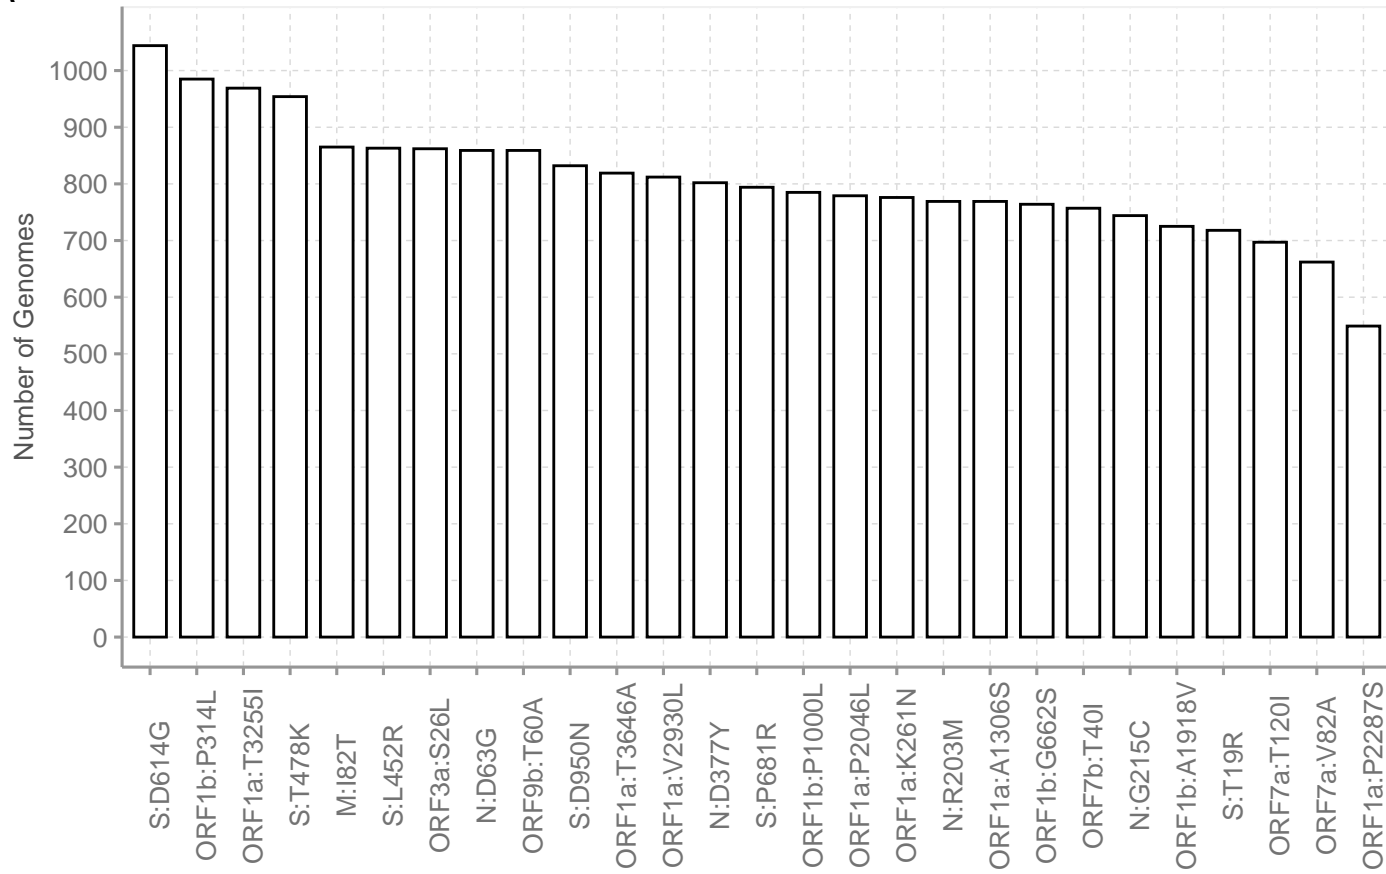

B

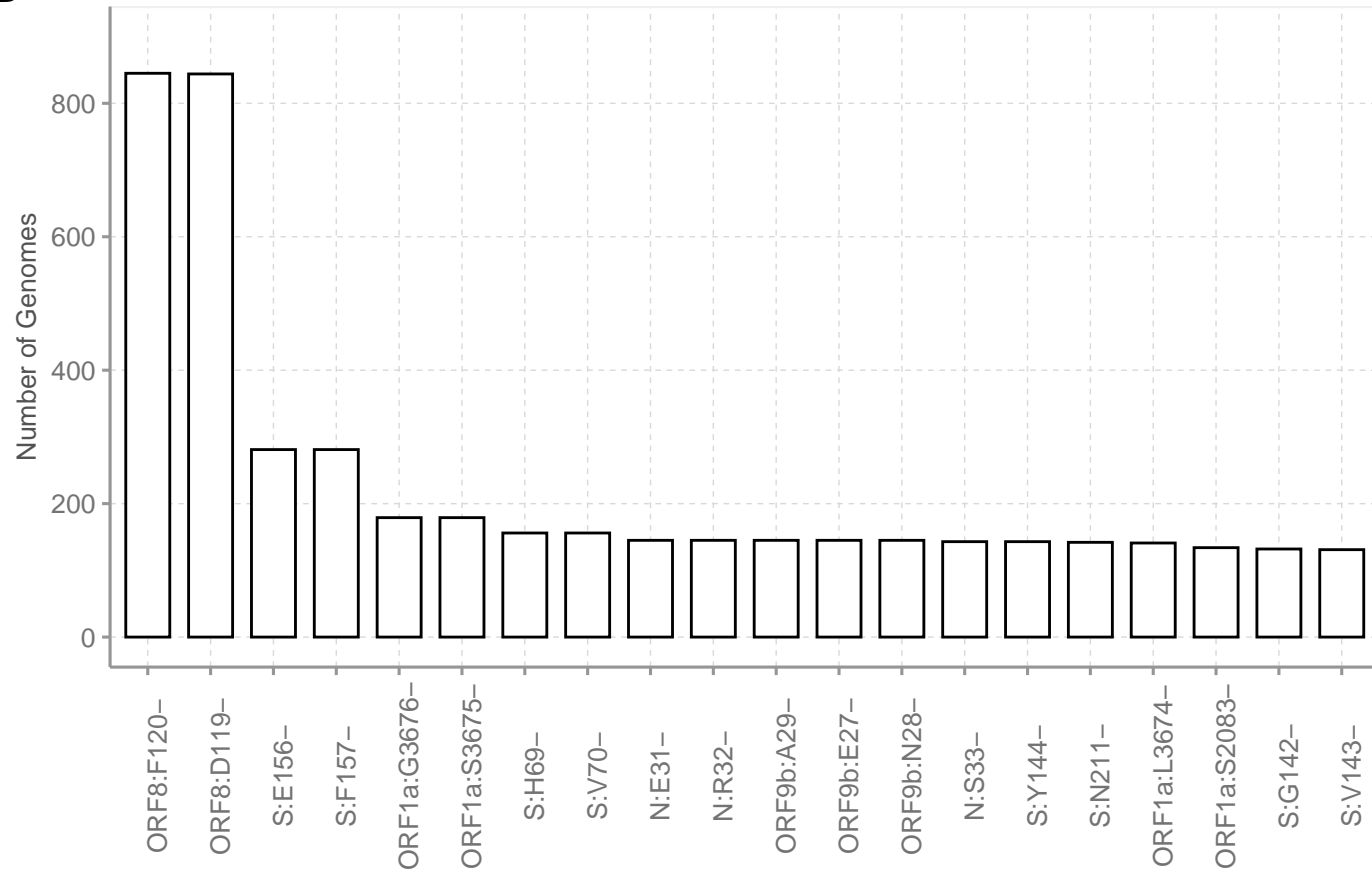

Supplement: Supplementary file [file media-3.pdf]
